# Supplementary material
Source: PubMed Central journal article supplement (PMC8473760)

**A**

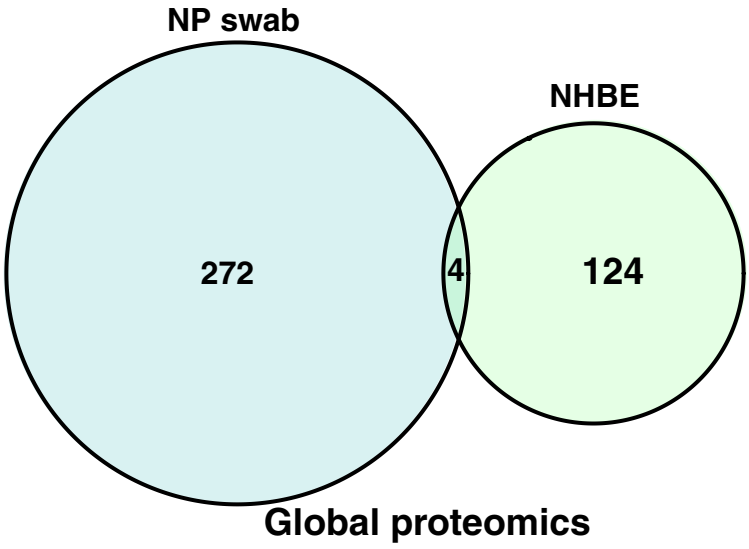

**B**

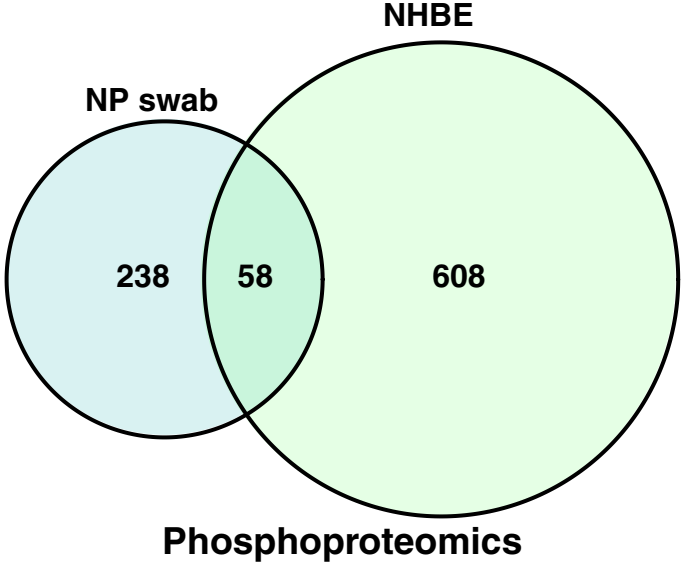

Supplement: mmc1.pdf [file mmc1.pdf]
