# Supplementary material
Source: PubMed Central journal article supplement (PMC8473760)

A

Upregulated (infected/non-infected)

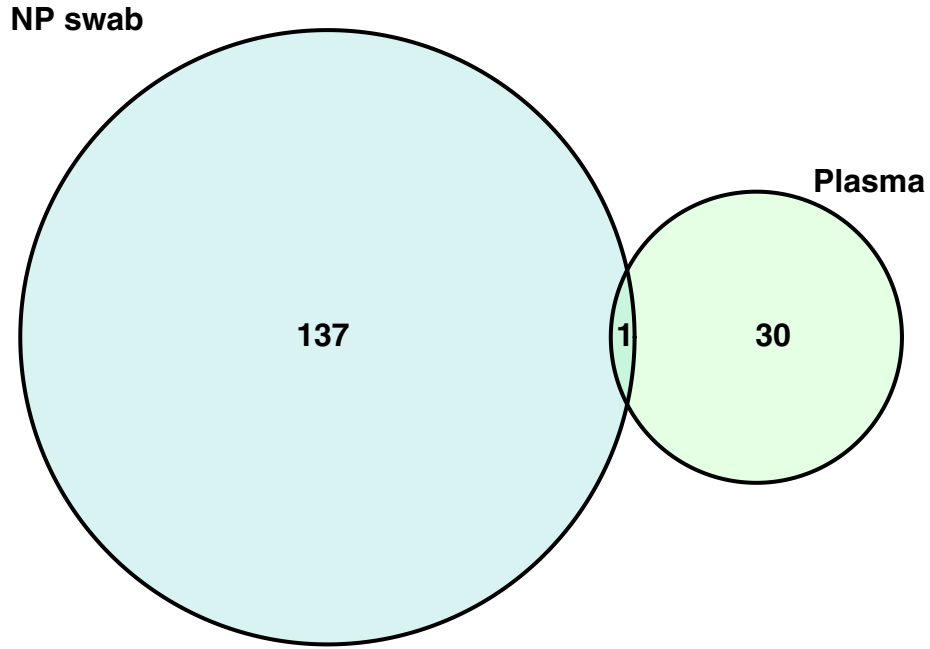

B

Downregulated (infected/non-infected)

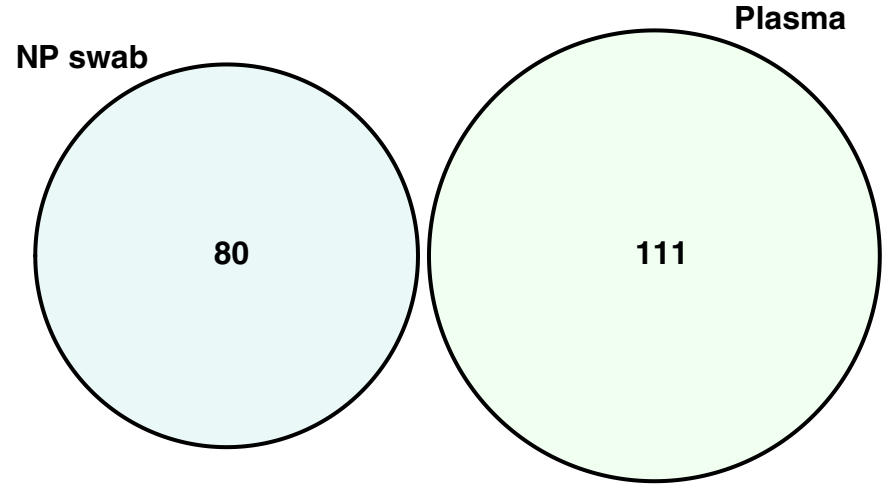

Supplement: mmc2.pdf [file mmc2.pdf]
